# Supplementary material for: No sex difference in preen oil chemical composition during incubation in Kentish plovers
Source: PeerJ journal article supplement (doi:10.7717/peerj.17243), 2024-05-08

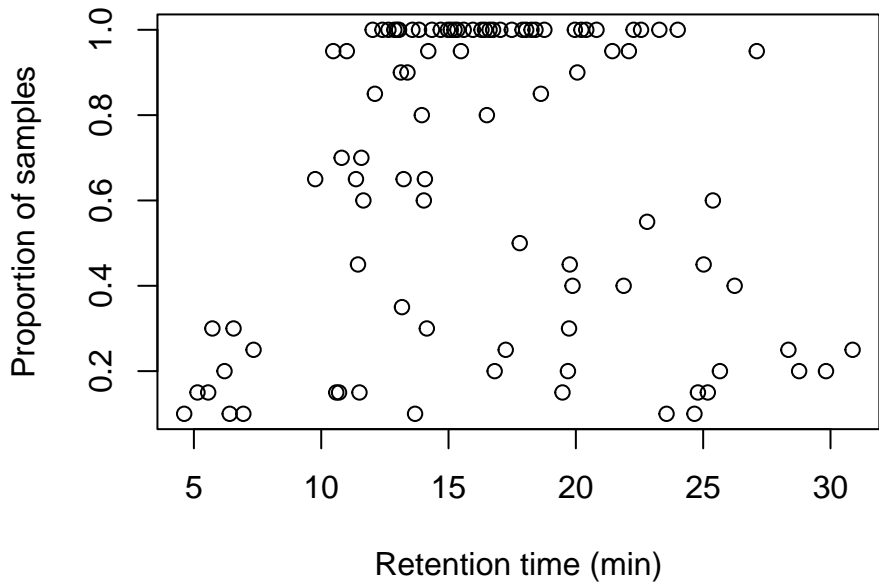

Supplement: FigureS2.pdf [file FigureS2.pdf]
