# Supplementary material for: No sex difference in preen oil chemical composition during incubation in Kentish plovers
Source: PeerJ. 2024 May 8;12:e17243. doi: 10.7717/peerj.17243 (PMC11088368; doi:10.7717/peerj.17243)
Supplement: Supplemental Information 9 [file peerj-12-17243-s009.xlsx]

## Sheet: Sheet1
variable	description
sample	sample ID
GC_order	order of processing in the gas chromatograph-mass spectrometer
date	date (dd/mm/yyyy)
date_may	May date (number of days, starting on 1st May)
time	time of day (hh:mm)
time_min	time of day (number of minutes, starting at 00:00)
laydate_may	laying date (number of days, starting on 1st May)
daysafterlay	number of days after laying
ring	bird ID
sex	sex (F = female; M = male)
nest	pair ID
